# Supplementary material for: Long noncoding RNA TUG1 inhibits osteogenesis of bone marrow mesenchymal stem cells via Smad5 after irradiation
Source: PubMed Central journal article supplement — Theranostics. 2019 Apr 12;9(8):2198–208. doi: 10.7150/thno.30798 (PMC6531293; doi:10.7150/thno.30798), 2019-04-12
Supplement: thnov09p2198s1.pdf [file thnov09p2198s1.pdf]

*Supplementary material*

**Long noncoding RNA TUG1 inhibits osteogenesis of bone marrow  
mesenchymal stem cells via Smad5 after irradiation**

**Weiwei Zhang<sup>\*</sup>, Li Chen<sup>\*</sup>, Jiang Wu<sup>\*</sup>, Jiuxuan Li, Xiaomei Zhang, Yang Xiang,  
Fengjie Li, Chun Wu, Lixin Xiang, Qian Ran ‡ and Zhongjun Li ‡**

Department of Blood Transfusion, Lab of Radiation biology, The Second Affiliated  
Hospital, Army Medical University, Chongqing, 400037, China.

\*These authors contributed equally to this work and should be considered co-first  
authors.

‡ Correspondence: [louise-r-q@163.com](mailto:louise-r-q@163.com), [johnneyusc@gmail.com](mailto:johnneyusc@gmail.com)

Journal: Theranostics.

Supplementary material: 4 figures with their legends and 2 tables.

**Table S1**

Noncoding RNAs were upregulated or downregulated by &gt; 2-fold after irradiation (P &lt; 0.05)

| Gene_Symbol      | 24_Average  | 0_Average   | FC          | 24-1        | 24-2        | 24-3        | 0-1         | 0-2         | 0-3         |
|------------------|-------------|-------------|-------------|-------------|-------------|-------------|-------------|-------------|-------------|
| RP11-386G11.10   | 7.64        | 8.76        | -2.17       | 7.48        | 7.84        | 7.59        | 8.81        | 8.64        | 8.82        |
| linc_luo_1230    | 3.65        | 5.82        | -4.52       | 3.85        | 3.50        | 3.56        | 5.95        | 5.71        | 5.79        |
| L43846           | 5.66        | 6.81        | -2.20       | 5.74        | 5.73        | 5.49        | 6.50        | 6.88        | 6.99        |
| L32866           | 3.34        | 4.36        | -2.02       | 3.23        | 3.37        | 3.40        | 4.19        | 4.20        | 4.66        |
| VCAN-AS1         | 4.87        | 3.32        | 2.84        | 4.28        | 5.06        | 5.11        | 3.48        | 3.12        | 3.34        |
| uc003pju.1       | 6.48        | 5.37        | 2.17        | 6.48        | 6.71        | 6.20        | 5.53        | 4.98        | 5.53        |
| uc003kor.1       | 5.76        | 4.75        | 2.08        | 5.57        | 5.75        | 5.94        | 4.55        | 4.32        | 5.22        |
| uc003jqp.2       | 8.98        | 7.80        | 2.29        | 8.78        | 9.04        | 9.10        | 7.97        | 7.42        | 7.95        |
| uc003isk.1       | 5.37        | 4.37        | 2.09        | 5.21        | 5.31        | 5.57        | 4.50        | 3.67        | 4.73        |
| uc001pye.1       | 7.27        | 5.47        | 3.73        | 7.33        | 7.27        | 7.21        | 6.11        | 4.93        | 5.07        |
| uc001elt.1       | 3.95        | 2.73        | 2.38        | 3.94        | 3.92        | 3.99        | 3.10        | 2.46        | 2.54        |
| <b>TUG1</b>      | <b>8.57</b> | <b>7.55</b> | <b>2.04</b> | <b>8.50</b> | <b>8.58</b> | <b>8.61</b> | <b>7.81</b> | <b>7.25</b> | <b>7.55</b> |
| THAP9-AS1        | 5.98        | 4.96        | 2.02        | 5.72        | 5.99        | 6.18        | 5.09        | 4.78        | 4.97        |
| RP11-787B4.2     | 5.21        | 3.66        | 2.91        | 5.41        | 5.35        | 4.81        | 3.78        | 3.77        | 3.39        |
| RP11-611O2.5     | 4.21        | 2.65        | 3.01        | 4.00        | 4.27        | 4.35        | 3.02        | 2.42        | 2.41        |
| PAPPA-AS1        | 6.84        | 5.41        | 2.75        | 6.70        | 7.03        | 6.76        | 5.77        | 5.03        | 5.32        |
| NR_024415        | 7.02        | 6.00        | 2.06        | 6.95        | 7.12        | 6.99        | 6.14        | 5.59        | 6.19        |
| NR_024020        | 5.63        | 4.52        | 2.18        | 5.32        | 5.64        | 5.88        | 4.51        | 4.09        | 4.87        |
| NR_003254_2      | 5.49        | 4.02        | 2.74        | 5.24        | 5.45        | 5.73        | 3.94        | 4.11        | 4.01        |
| NR_003252        | 6.10        | 4.92        | 2.32        | 6.02        | 6.34        | 5.89        | 5.29        | 4.40        | 4.92        |
| MIR548O2         | 5.01        | 4.07        | 2.01        | 4.69        | 5.04        | 5.26        | 4.65        | 3.85        | 3.46        |
| MIR548AA2        | 6.51        | 5.43        | 2.35        | 6.14        | 6.50        | 6.81        | 6.22        | 4.68        | 4.84        |
| LOC285505        | 5.02        | 3.81        | 2.27        | 4.65        | 5.04        | 5.30        | 3.85        | 3.83        | 3.76        |
| LOC100129550     | 5.25        | 4.16        | 2.20        | 5.07        | 5.24        | 5.43        | 4.37        | 3.55        | 4.41        |
| LOC100129550     | 5.01        | 4.02        | 2.06        | 4.88        | 5.05        | 5.08        | 4.10        | 3.39        | 4.40        |
| linc-ZNF543      | 6.52        | 5.49        | 2.10        | 6.72        | 6.41        | 6.41        | 5.97        | 5.22        | 5.13        |
| linc-SLC39A10-10 | 3.24        | 2.08        | 2.28        | 3.28        | 3.26        | 3.17        | 2.34        | 1.68        | 2.12        |
| linc-RAD23B-2    | 3.89        | 2.49        | 2.60        | 3.88        | 3.59        | 4.13        | 2.55        | 2.57        | 2.36        |
| linc-POTED-3     | 6.34        | 4.70        | 3.15        | 6.10        | 6.31        | 6.58        | 4.47        | 4.47        | 5.08        |
| linc-PAX8-3      | 5.73        | 4.66        | 2.12        | 5.78        | 5.71        | 5.70        | 4.89        | 4.36        | 4.68        |
| linc-PAPPA-1     | 5.25        | 3.95        | 2.41        | 5.29        | 5.57        | 4.79        | 3.99        | 4.02        | 3.83        |
| linc-NBPF15-1    | 7.58        | 5.93        | 3.19        | 7.51        | 7.62        | 7.61        | 6.21        | 5.64        | 5.87        |
| linc-FAM75A6-8   | 7.67        | 6.64        | 2.05        | 7.55        | 7.67        | 7.80        | 6.74        | 6.38        | 6.79        |
| linc-CGGBP1-3    | 5.62        | 4.57        | 2.06        | 5.27        | 5.53        | 5.97        | 4.80        | 4.18        | 4.66        |
| linc-ANKRD20A1-8 | 6.66        | 4.92        | 3.32        | 6.48        | 6.50        | 6.94        | 4.79        | 4.76        | 5.17        |
| LINC00657        | 7.91        | 6.87        | 2.07        | 7.78        | 7.97        | 7.97        | 7.12        | 6.65        | 6.79        |
| linc_luo_504     | 6.46        | 5.27        | 2.39        | 6.34        | 6.47        | 6.56        | 5.81        | 4.89        | 4.91        |

|               |      |      |      |      |      |      |      |      |      |
|---------------|------|------|------|------|------|------|------|------|------|
| linc_luo_185  | 6.11 | 4.35 | 3.54 | 5.78 | 6.09 | 6.40 | 4.92 | 3.92 | 3.97 |
| linc_luo_1223 | 5.07 | 4.11 | 2.06 | 4.90 | 5.18 | 5.10 | 4.69 | 3.49 | 3.88 |
| HNRNPU-AS1    | 4.23 | 2.97 | 2.52 | 4.35 | 4.23 | 4.11 | 3.49 | 2.38 | 2.82 |
| DNM3OS        | 5.99 | 4.68 | 2.49 | 5.69 | 5.96 | 6.27 | 4.91 | 4.27 | 4.80 |
| CR614809      | 6.78 | 5.75 | 2.07 | 6.61 | 6.87 | 6.85 | 5.94 | 5.39 | 5.86 |
| CR613639      | 8.34 | 7.26 | 2.12 | 8.14 | 8.40 | 8.46 | 7.49 | 7.12 | 7.14 |
| CR608583      | 6.34 | 5.22 | 2.18 | 6.22 | 6.26 | 6.52 | 5.37 | 4.97 | 5.30 |
| CR607695      | 5.89 | 4.88 | 2.02 | 5.81 | 5.90 | 5.96 | 5.03 | 4.82 | 4.78 |
| CR594753      | 4.17 | 2.90 | 2.42 | 3.81 | 4.31 | 4.34 | 3.21 | 2.70 | 2.72 |
| CR590425      | 5.43 | 4.43 | 2.03 | 5.37 | 5.51 | 5.41 | 4.60 | 4.01 | 4.60 |
| BC041400      | 5.53 | 4.48 | 2.07 | 5.29 | 5.58 | 5.69 | 4.65 | 4.26 | 4.51 |
| BC035072      | 5.23 | 4.04 | 2.36 | 5.14 | 5.26 | 5.28 | 3.94 | 3.57 | 4.46 |
| AY011601      | 9.56 | 7.99 | 2.97 | 9.59 | 9.46 | 9.61 | 8.10 | 8.00 | 7.86 |
| AX746517      | 4.91 | 3.88 | 2.05 | 4.60 | 4.97 | 5.12 | 4.17 | 3.63 | 3.78 |
| ANKRD10-IT1   | 4.27 | 3.05 | 2.39 | 4.18 | 4.32 | 4.30 | 3.40 | 3.00 | 2.62 |
| AK129948      | 4.42 | 3.05 | 2.61 | 4.16 | 4.50 | 4.58 | 3.27 | 2.63 | 3.17 |
| AK097984      | 6.50 | 4.83 | 3.94 | 6.36 | 6.62 | 6.52 | 5.79 | 4.22 | 3.56 |
| AK095091      | 5.85 | 4.84 | 2.10 | 5.88 | 5.74 | 5.92 | 5.36 | 4.41 | 4.56 |
| AK094510      | 4.78 | 3.68 | 2.15 | 4.75 | 4.81 | 4.78 | 3.70 | 3.59 | 3.74 |
| AK001903      | 5.76 | 4.48 | 2.45 | 5.58 | 6.06 | 5.58 | 4.82 | 4.15 | 4.38 |

**Table S2**  
The probes of TUG1

| PROBE | PROBE (5'-> 3')      | PROBE POSITION | PERCENT GC |
|-------|----------------------|----------------|------------|
| 1     | cgagttctgcgtacgagaag | 318            | 55.00%     |
| 2     | cactaaggcggcataaggag | 591            | 55.00%     |
| 3     | attgtaccatagcatcagc  | 1261           | 40.00%     |
| 4     | cagaacacatccactcctaa | 1306           | 45.00%     |
| 5     | atggctgtggaatatggca  | 1420           | 45.00%     |
| 6     | ctactgatttgaggtccg   | 1676           | 45.00%     |
| 7     | agaacacaaggaggccaag  | 1727           | 55.00%     |
| 8     | tctctgcccttaggaaaag  | 2029           | 45.00%     |
| 9     | tttgaggtacatccggatt  | 2120           | 40.00%     |
| 10    | aagcatctatcaccacagt  | 2148           | 40.00%     |
| 11    | ttatctgctccaactattgc | 2280           | 40.00%     |
| 12    | tggaaatctggagtccatgg | 2318           | 50.00%     |
| 13    | tcacagcaaggtaacagtc  | 2430           | 50.00%     |
| 14    | gtctggacagaaactcaggt | 2508           | 50.00%     |
| 15    | ttcactttggatggagcatc | 2545           | 45.00%     |

|    |                       |      |        |
|----|-----------------------|------|--------|
| 16 | atagcacagggaggtagtc   | 2611 | 50.00% |
| 17 | gcaaaaatccaggtaccagg  | 2647 | 50.00% |
| 18 | gtcagtagtaaggtgtagg   | 2678 | 50.00% |
| 19 | acaaactaggcctttgtgt   | 2855 | 40.00% |
| 20 | tgtttctcattcagtaggc   | 3099 | 40.00% |
| 21 | actgtgccttfgattgatc   | 3135 | 40.00% |
| 22 | ggactccttgtagaatttc   | 3217 | 45.00% |
| 23 | tgtctctgcacttticta    | 3674 | 35.00% |
| 24 | aatgatcattcctggggtc   | 3705 | 45.00% |
| 25 | ggctgttaatctaggtcac   | 3742 | 45.00% |
| 26 | ccattctaggaatcactgga  | 3780 | 45.00% |
| 27 | cttaaggagtagctcagtg   | 3832 | 50.00% |
| 28 | caagtaccagtagagcatct  | 3859 | 45.00% |
| 29 | aggtattcatggagggtcaa  | 3899 | 45.00% |
| 30 | atgaggcaccagctcaaaa   | 3937 | 45.00% |
| 31 | caagttgctctaataatggcc | 3960 | 45.00% |
| 32 | aagtagagtaccatggctga  | 3999 | 45.00% |
| 33 | ccaaggggcaatataactgc  | 4140 | 50.00% |
| 34 | tcacatgagaaggggtgtc   | 4332 | 50.00% |
| 35 | attgagactgatgtggtcc   | 4666 | 45.00% |
| 36 | ggcaaggaatgaagtcagct  | 4712 | 50.00% |
| 37 | gctggcctftaaattgactg  | 4882 | 45.00% |
| 38 | attcattcgagtagctcagg  | 4905 | 45.00% |
| 39 | aggctagtcaaccagatttt  | 5062 | 40.00% |
| 40 | actcgagcagatgatcatct  | 5263 | 45.00% |
| 41 | gcatggagacatggagacag  | 5360 | 55.00% |
| 42 | ccgatctctgagaatcatct  | 5445 | 45.00% |
| 43 | aggttctgtttaggagtcta  | 5560 | 40.00% |
| 44 | ctgccaagaactttcagct   | 5611 | 45.00% |
| 45 | ctggaagaaccagcagatca  | 5759 | 50.00% |
| 46 | ggtaaatcggactcatttct  | 6174 | 45.00% |
| 47 | agtggatcatgagtctgagag | 6341 | 50.00% |
| 48 | ccacagttcaacacaagca   | 6366 | 45.00% |

---

```

                *           20           *           40
Smad5-1 : TTAGCAGTTCCCCAATCCTTGGGTTTTGAACCTGGGAACCT : 41
Smad5-2 : TTAGCAGTTCCCCAATCCTTGGGTTTTGAACCTGGGAACCT : 41
TUG1    : -TAGCAGTTCCCCAATCCTTGGGTTTTGAACCTGGGAACCT : 40
          tTAGCAGTTCCCCAATCCTTGGGTTTTGAACCTGGGAACCT

                *           60           *           80
Smad5-1 : TGGATTGGAGTTGGGGATCCCCAAACTTCCTGAAATTGTGG : 82
Smad5-2 : TGGATTGGAGTTGGGGATCCCCAAACTTCCTGAAATTGTGG : 82
TUG1    : TGGATTGGAGTTGGGGATCCCCAAACTTCCTGAAATTGTGG : 81
          TGGATTGGAGTTGGGGATCCCCAAACTTCCTGAAATTGTGG

                *           100          *
Smad5-1 : GAATGTGCGGTTTGGGGGAATGATGGGAATTTGT- : 116
Smad5-2 : GAATGTGCGGTTTGGGGGAATGATGGGAATTTGTG : 117
TUG1    : GAATGTGCGGTTTGGGGGAATGATGGGAATTTGTG : 116
          GAATGTGCGGTTTGGGGGAATGATGGGAATTTGTg

```

### Figure S1. The RIP sequencing results

Smad5-1: The sequencing results of the indicated RNAs retrieved by Smad5-specific antibody in non-radiated BM-MSCs, Smad5-2: The sequencing results of the indicated RNAs retrieved by Smad5-specific antibody in radiated BM-MSCs

```

                *           20           *           40
25 : ---ACCTCACC GGGC---CCAGTACAAGCAGCAGAACACAGCT : 37
50 : GGGGTATGAGTCGATTCAACCAGTACACACAGACTGTACAGTT : 44
TUG1 : ----- : -
          t a g c c a g t a c a c a g a a c a g t

                *           60           *           80
25 : TGAAGGGCCAAAGGACAAAAGCCACTTAAAGGACGTACGAAC : 81
50 : CAACCTAGCAAAAGAGAAATTTCCCTTGTACTTAAATTT : 88
TUG1 : ----- : -
          a c c a a g a a a a g c a g a c t a a

                *           100          *           120          *
25 : ACATCCACTCCTCAAAG---C---GAATTATTGATGTCCA : 115
50 : ACAGCTTGACTTCAAATTTGCCTCACA GAATTATTGATGTA : 131
TUG1 : ----- : -
          a c a c c t c a a c g a a t t t g c c t c a c a g a a t t a t t g a t g t a

                140           *           160           *
25 : AAGGCTAGTTGTCTTACTTCAGATCAGCAGGACAGTTGGGCTCT : 159
50 : AAGGCTAGTTGTCTTACTTCAGATCAGCAGGACAGTTGGGCTCT : 175
TUG1 : ----- : -
          a a g g c t a g t t g t c t t a c t t c a g a t c a g c a g g a c a g t t g g g c t c t

                180           *           200           *           220
25 : CAACTCATGACCACTGAGTTTGCTTGTGTTGAAACTGTGGTTT : 203
50 : CAGACTCATGACCACTGAGTTTGCTTGTGTTGAAACTGTGGTTT : 219
TUG1 : ---ACTCATGACCACTGAGTTTGCTTGTGTTGAAACTGTGGTTT : 41
          c a a c t c a t g a c c a c t g a g t t t g c t t g t g t t g a a a c t g t g g t t t

                *           240           *           260
25 : CATCCAACATATGCTATTGGACATGATTATTATTCCATTCAAAT : 247
50 : CATCCAACATATGCTATTGGACATGATTATTATTCCATTCAAAT : 263
TUG1 : CATCCAACATATGCTATTGGACATGATTATTATTCCATTCAAAT : 85
          c a t c c a a c a t a t g c t a t t g g a c a t g a t t a t t a t t c c a t t c a a a t

                *           280           *           300
25 : GGATTACAGACTTCTTGAGGACAGGACAAACTTATCTCTCATGG : 291
50 : GGATTACAGACTTCTTGAGGACAGGACAAACTTATCTCTCATGG : 307
TUG1 : GGATTACAGACTTCTTGAGGACAGGACAAACTTATCTCTCATGG : 129
          g g a t t a c a g a c t t c t t g a g g a c a g g a c a a a c t t a t c t c t c a t g g

                *           320           *           340           *
25 : TGTTTTTTAGAATACTTTTATAACCAAGGAGG-ACCCTT----- : 329
50 : TGTTTTTTAGAATACTTTTATAACCAAGGAAAGCAACCAATGC : 351
TUG1 : TGTTTTTTAGAATACTTTTATAACCA----- : 156
          t g t t t t t t a g a a t a c t t t t a t a a c c a a g g a g g a c c c t t g a g a c c

          g a g a c c

```

### Figure S2. The RIP sequencing results

25: The sequencing results of the indicated RNAs retrieved by Flag-specific antibody within BM-MSCs transfected with  $\Delta 25$  deletion constructs, 50: The sequencing results of the indicated RNAs retrieved by Flag-specific antibody within BM-MSCs transfected with  $\Delta 50$  deletion constructs

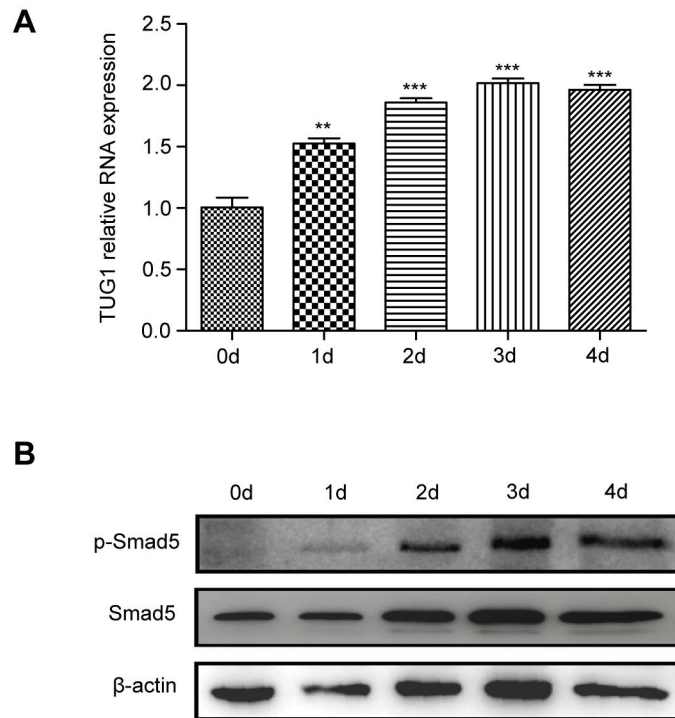

### Figure S3. The expression levels of TUG1 and the phosphorylation level of Smad5 significantly increased in mice bone marrow cells after irradiation.

C57BL/6J mice were irradiated with 9 Gy Co-60 at a rate of 0.69 Gy/min. Mice bone marrows were harvested 1 day, 2 days, 3 days and 4 days after irradiation. (A) qRT-PCR was performed to detect the expression levels of TUG1 in mice bone marrow cells after irradiation. (B) Western blot was performed to detect the phosphorylation level of Smad5 in mice bone marrow cells after irradiation. All experiments were performed in triplicate, and the bars represent the mean  $\pm$ SEM. \* $P < 0.05$ , \*\* $P < 0.01$ , \*\*\* $P < 0.001$

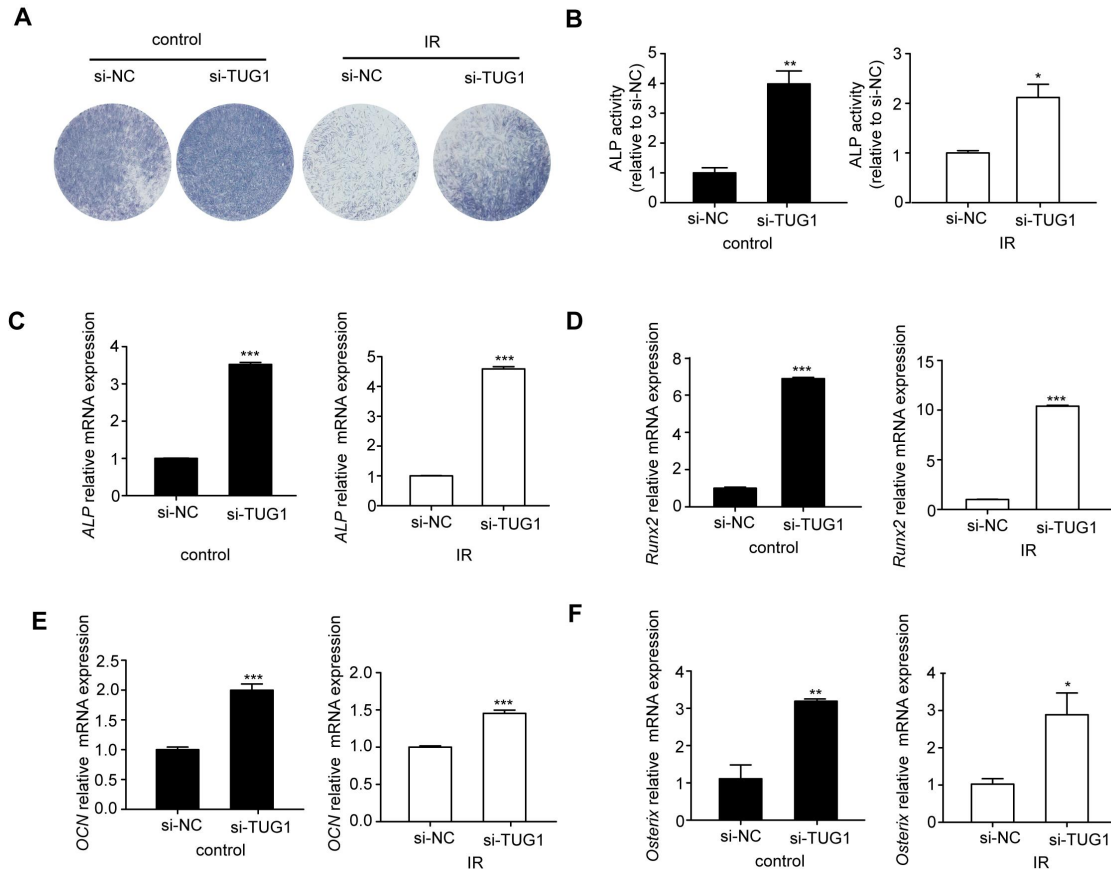

**Figure S4. TUG1 inhibits the osteogenic differentiation of BM-MSCs at day 7 after osteogenic induction**

(A) The alkaline phosphatase (ALP) staining was performed to detect the effect of TUG1 knockdown on osteogenic differentiation of non-irradiated BM-MSCs and irradiated BM-MSCs. (B) The ALP activity quantification. (C-F) qRT-PCR was performed to detect the effect of TUG1 knockdown on the mRNA levels of *ALP* (C), *Runx2* (D), *OCN* (E) and *osterix* (F) in BM-MSCs after 7 days of osteogenic induction.

All experiments were performed in triplicate, and the bars represent the mean  $\pm$ SEM. \* $P < 0.05$ , \*\* $P < 0.01$ , \*\*\* $P < 0.001$

Control: non-irradiated BM-MSCs; IR: irradiated BM-MSCs; si-NC: BM-MSCs transfected with empty vector, si-TUG1: BM-MSCs transfected with TUG1-siRNA vector.
